# Supplementary material
Source: Springer Nature journal article supplement (https://www.springermedizin.de/resource/supplementary/13019_2013_1427_MOESM4_ESM.pdf/9640642)
Supplement: MOESM4 [file 9640642]

| Model  | Study name  | Statistics for each study |             |             |         |         | Odds ratio and 95% CI |      |      |      |      |      |       |
|--------|-------------|---------------------------|-------------|-------------|---------|---------|-----------------------|------|------|------|------|------|-------|
|        |             | Odds ratio                | Lower limit | Upper limit | Z-Value | p-Value | 0.10                  | 0.20 | 0.50 | 1.00 | 2.00 | 5.00 | 10.00 |
|        | Finci       | 1.057                     | 0.550       | 2.033       | 0.167   | 0.868   |                       |      |      |      |      |      |       |
|        | warren      | 0.852                     | 0.256       | 2.837       | -0.261  | 0.794   |                       |      |      |      |      |      |       |
|        | ivanhoe     | 0.358                     | 0.242       | 0.530       | -5.144  | 0.000   |                       |      |      |      |      |      |       |
|        | angioi      | 0.718                     | 0.407       | 1.265       | -1.147  | 0.251   |                       |      |      |      |      |      |       |
|        | noguchi     | 0.437                     | 0.252       | 0.758       | -2.945  | 0.003   |                       |      |      |      |      |      |       |
|        | suero       | 0.589                     | 0.458       | 0.757       | -4.127  | 0.000   |                       |      |      |      |      |      |       |
|        | olivari     | 0.541                     | 0.332       | 0.881       | -2.469  | 0.014   |                       |      |      |      |      |      |       |
|        | hoye        | 0.565                     | 0.422       | 0.756       | -3.838  | 0.000   |                       |      |      |      |      |      |       |
|        | drozd       | 0.755                     | 0.514       | 1.109       | -1.431  | 0.153   |                       |      |      |      |      |      |       |
|        | aziz        | 0.667                     | 0.460       | 0.966       | -2.146  | 0.032   |                       |      |      |      |      |      |       |
|        | prasad      | 0.820                     | 0.614       | 1.094       | -1.350  | 0.177   |                       |      |      |      |      |      |       |
|        | valenti     | 0.847                     | 0.478       | 1.500       | -0.570  | 0.568   |                       |      |      |      |      |      |       |
|        | labriolle   | 0.407                     | 0.200       | 0.829       | -2.477  | 0.013   |                       |      |      |      |      |      |       |
|        | zhuyanbin   | 0.990                     | 0.411       | 2.384       | -0.021  | 0.983   |                       |      |      |      |      |      |       |
|        | Yixianhua   | 1.070                     | 0.678       | 1.689       | 0.291   | 0.771   |                       |      |      |      |      |      |       |
|        | chenshaolia | 0.296                     | 0.037       | 2.337       | -1.155  | 0.248   |                       |      |      |      |      |      |       |
| Fixed  |             | 0.643                     | 0.577       | 0.717       | -7.988  | 0.000   |                       |      |      |      |      |      |       |
| Random |             | 0.649                     | 0.554       | 0.761       | -5.323  | 0.000   |                       |      |      |      |      |      |       |
